# Supplementary material for: Synthesis of multisubstituted furans via Cu(i)-catalyzed annulation of ketones with alkynoate under ligand- and additive-free conditions
Source: Royal Society of Chemistry journal article supplement (doi:10.1039/c5ra23058f), 2016-01-01

## Electronic Supplementary Information

### Synthesis of multisubstituted furans via Cu(I)-catalyzed annulation of ketones with alkynoate under ligand- and additive-free conditions†

Zaigang Luo,<sup>\*a</sup> Yuyu Fang,<sup>a</sup> Yu Zhao,<sup>a</sup> Peng Liu<sup>b</sup>, Xuemei Xu,<sup>a</sup> Chengtao Feng,<sup>a</sup> Zhong Li,<sup>a</sup> Jie He<sup>\*a</sup>

<sup>a</sup> College of Chemical Engineering, Anhui University of Science & Technology, Huainan 232001, P. R. China.

<sup>b</sup> Guang Zhou Institutes of Biomedicine and Health, Chinese Academy of Sciences, Guangzhou 510530, China

\* Corresponding Authors: E-mail: [luozi139@163.com](mailto:luozi139@163.com); [aust\\_jhe@163.com](mailto:aust_jhe@163.com)

### Contents

| Section                                                                                            | page no |
|----------------------------------------------------------------------------------------------------|---------|
| (1) Spectral data scans of all synthesized compounds ( <sup>1</sup> H NMR and <sup>13</sup> C NMR) | 2-18    |

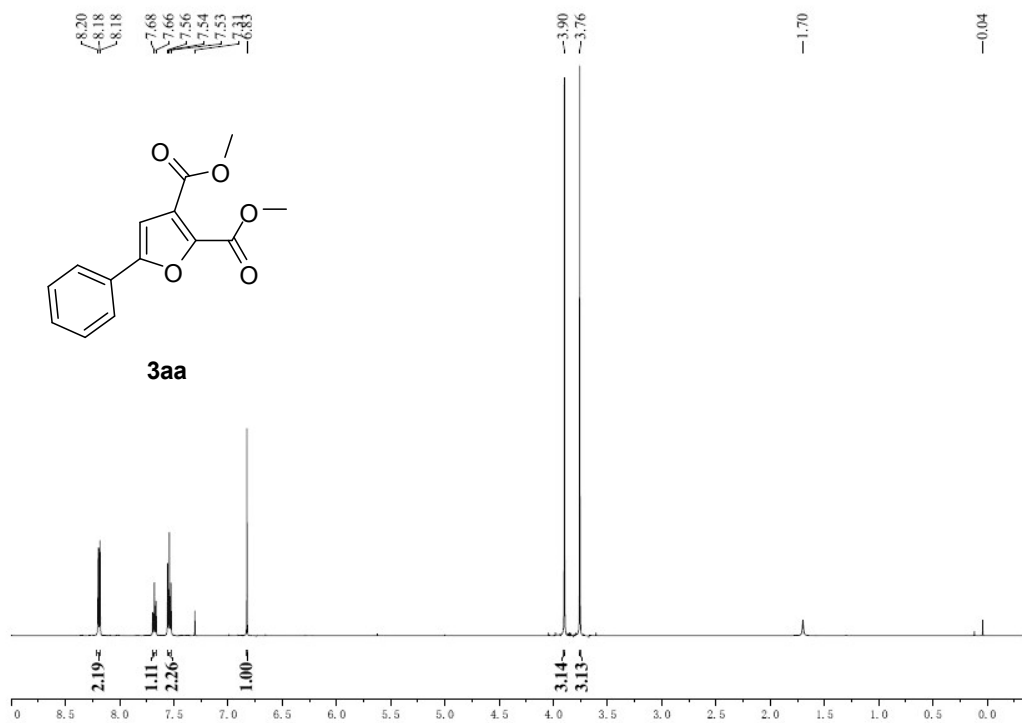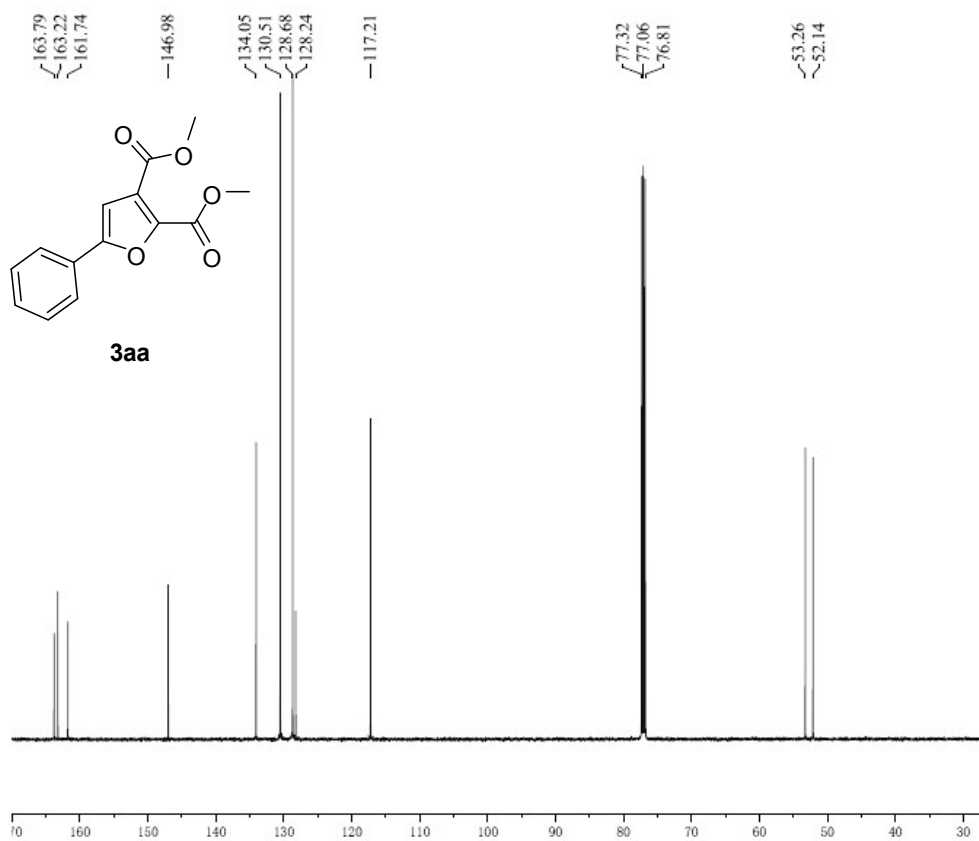

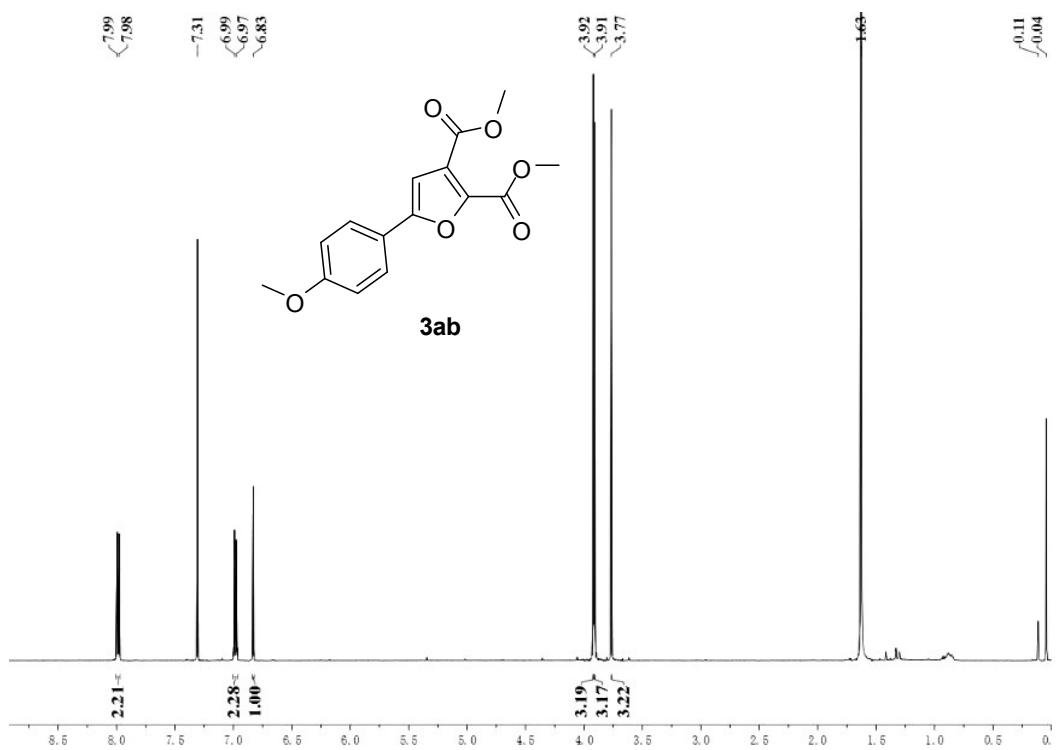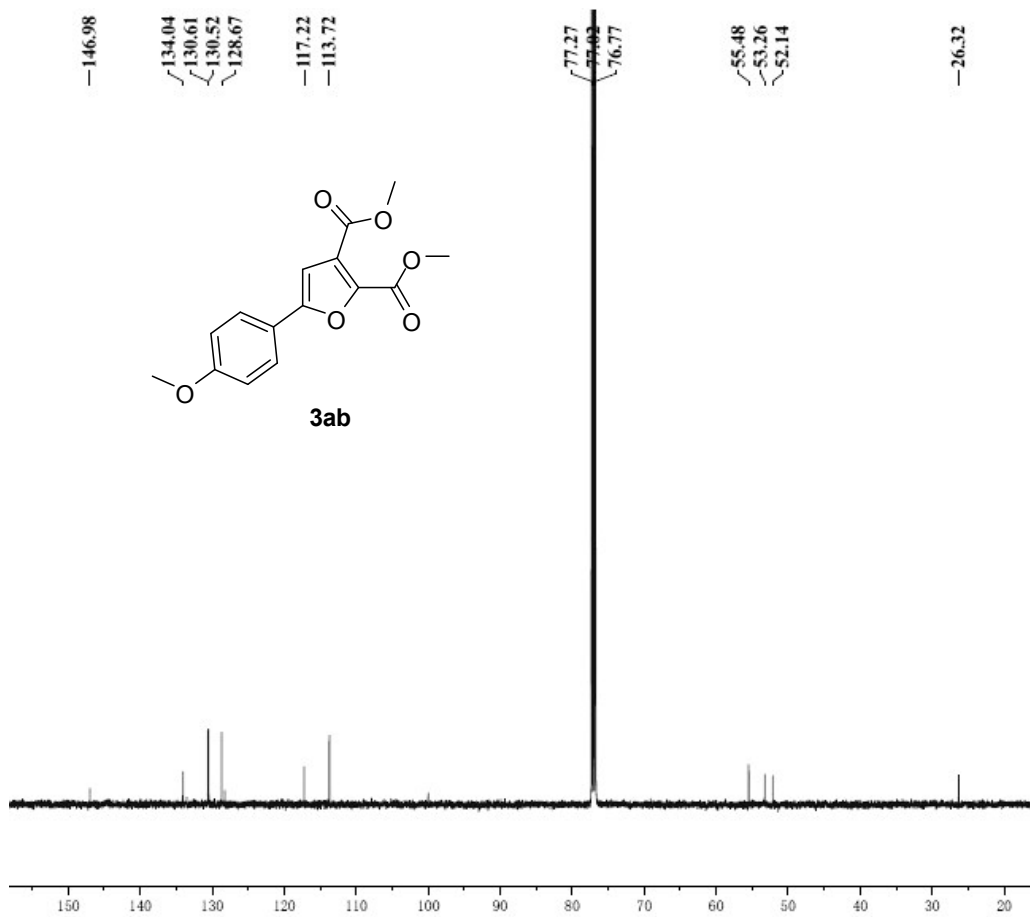

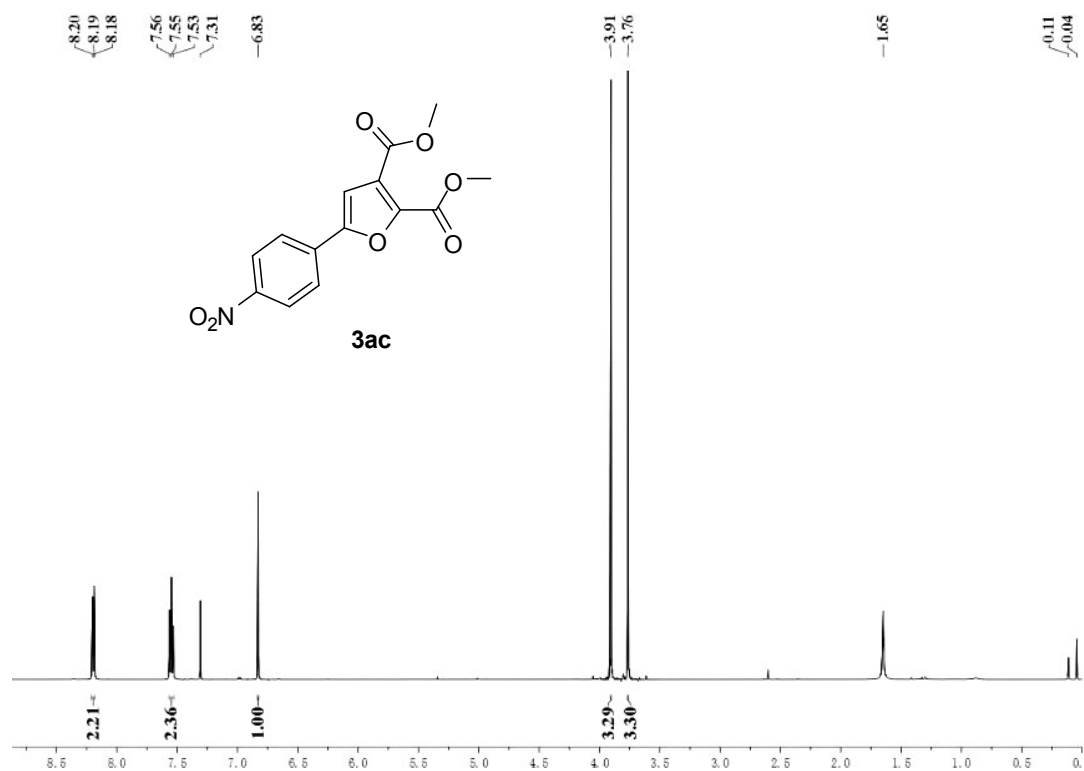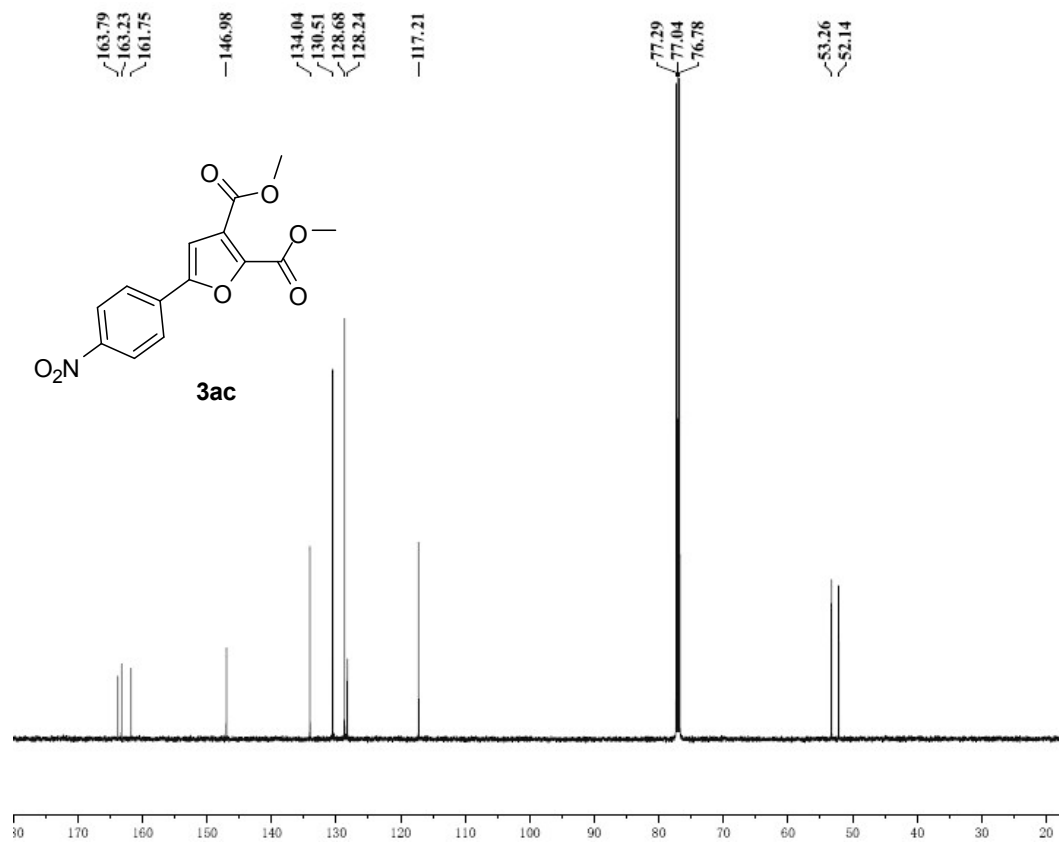

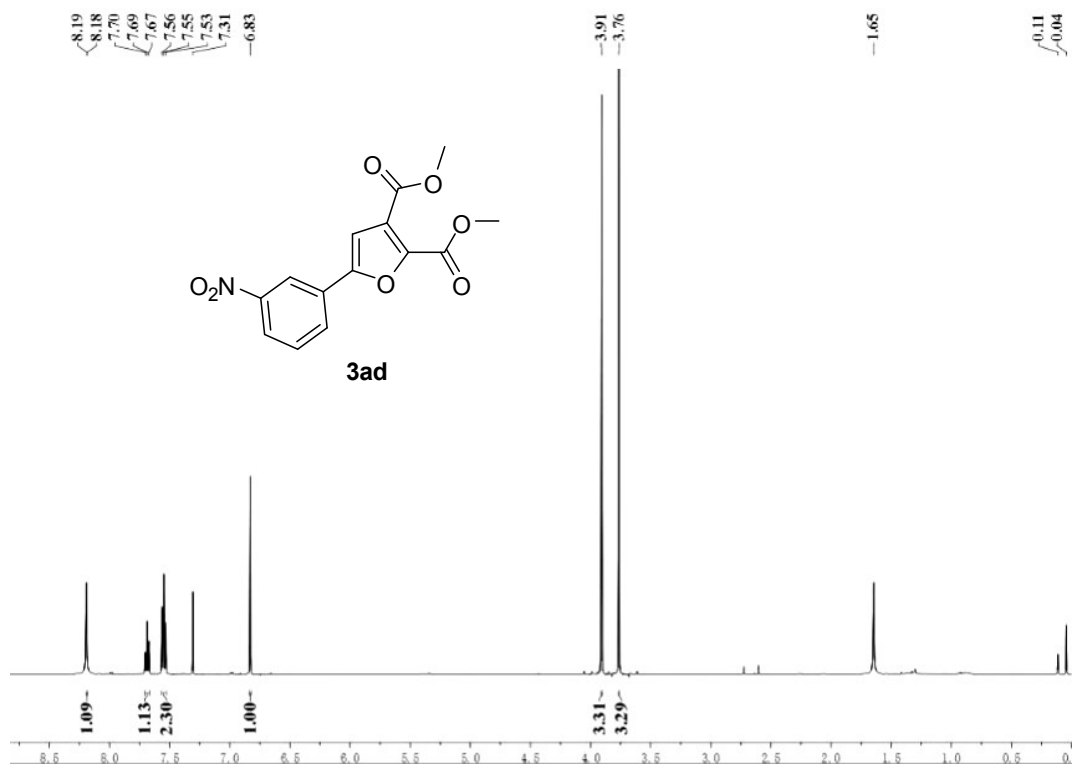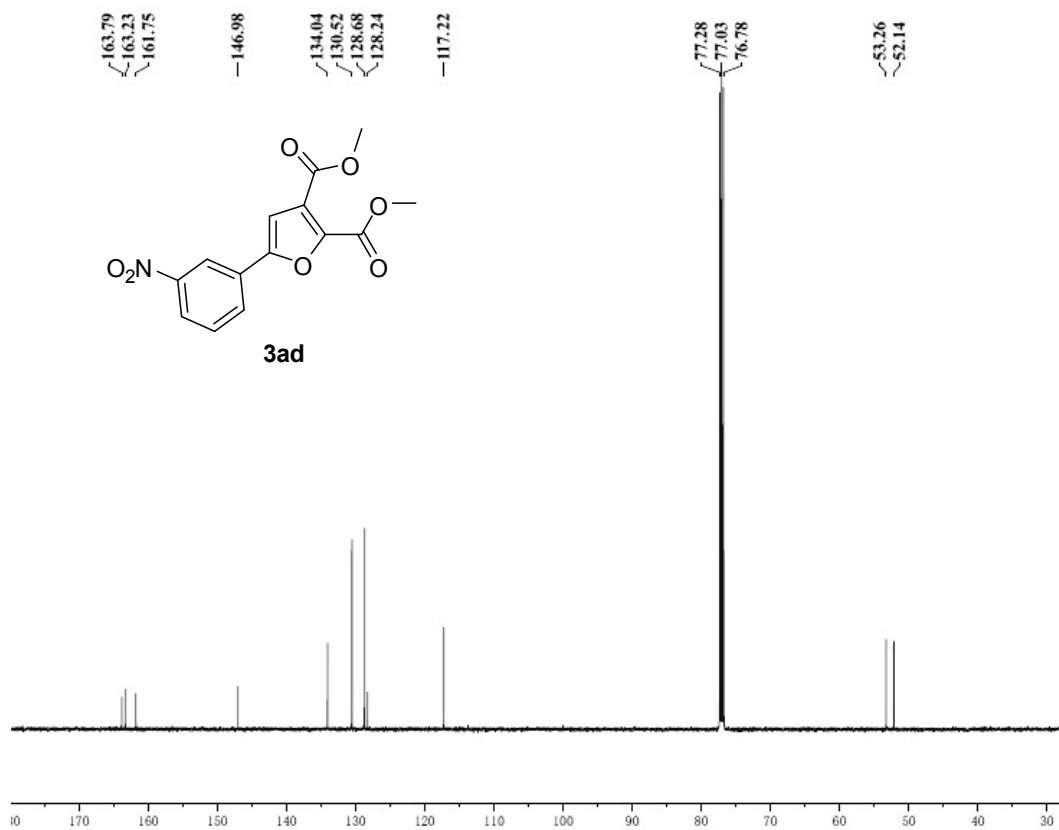

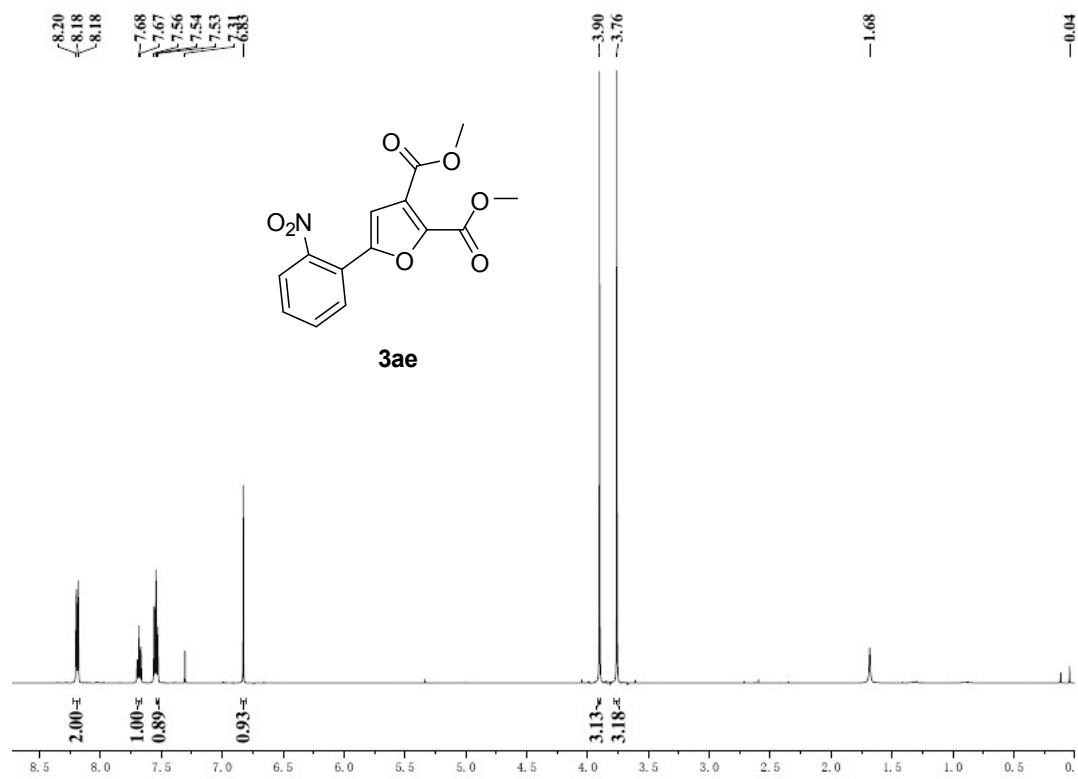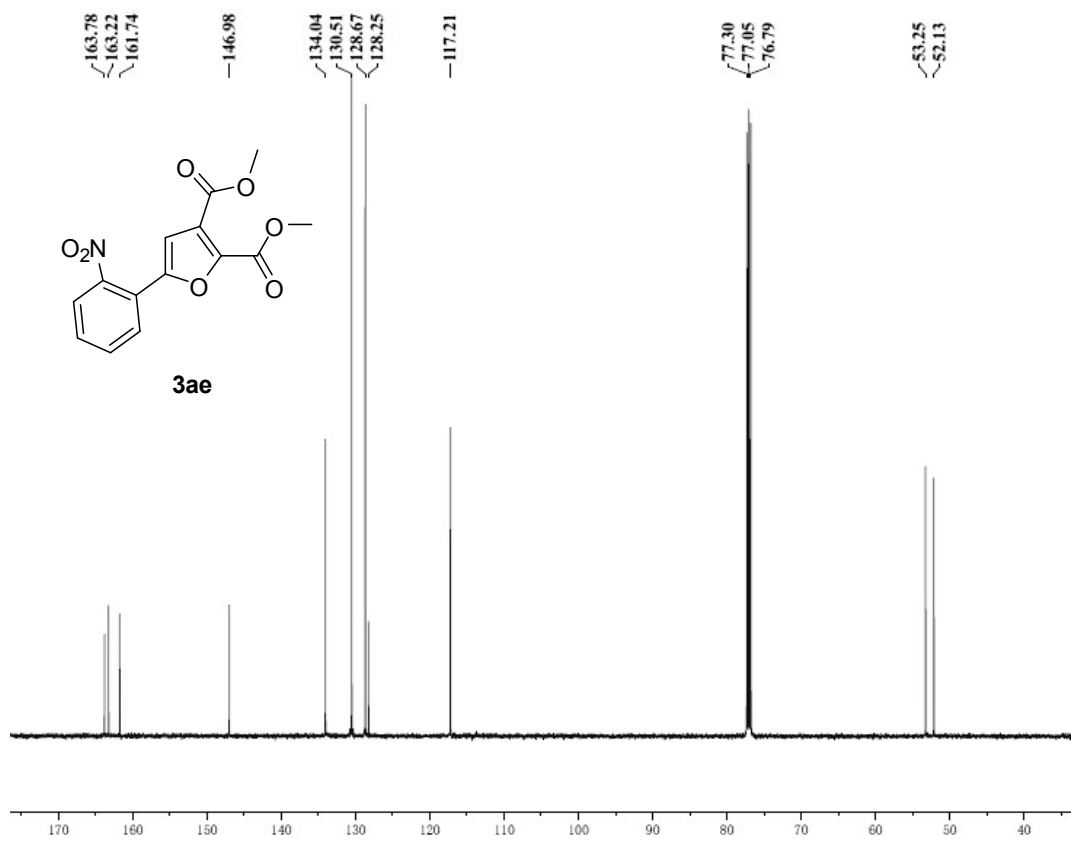

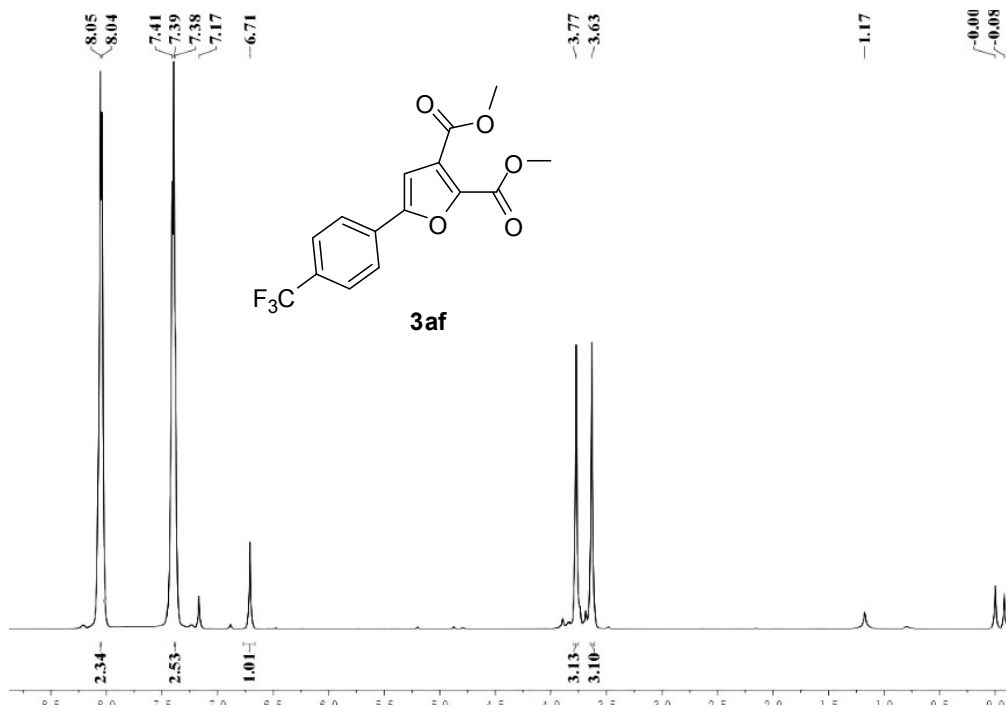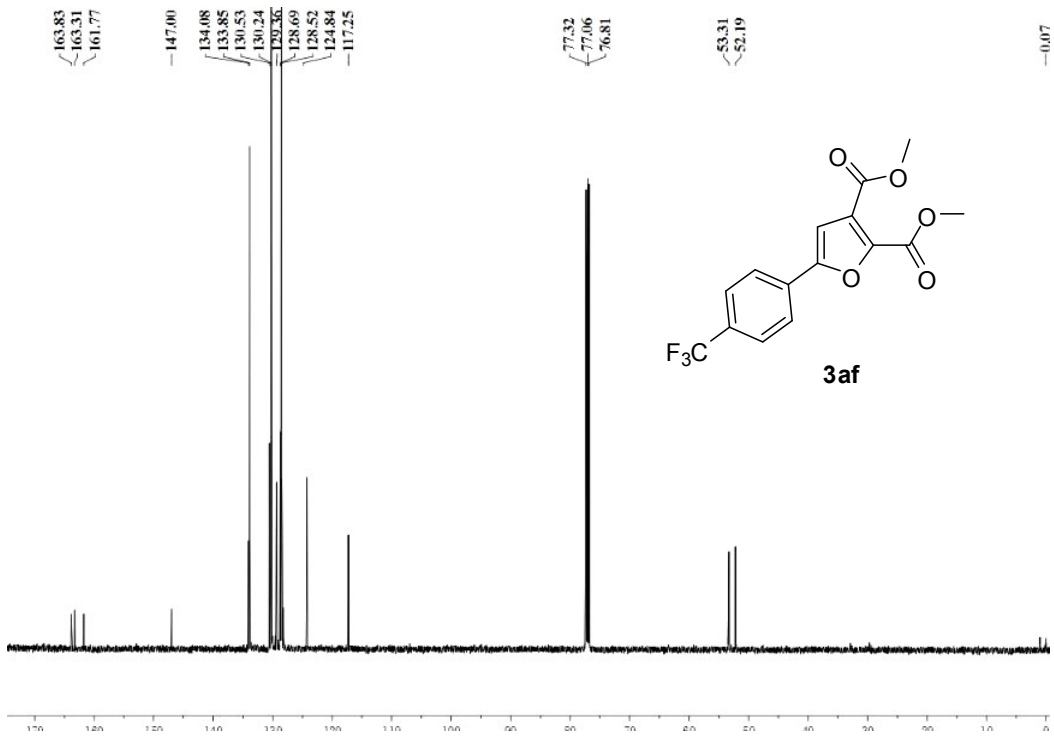

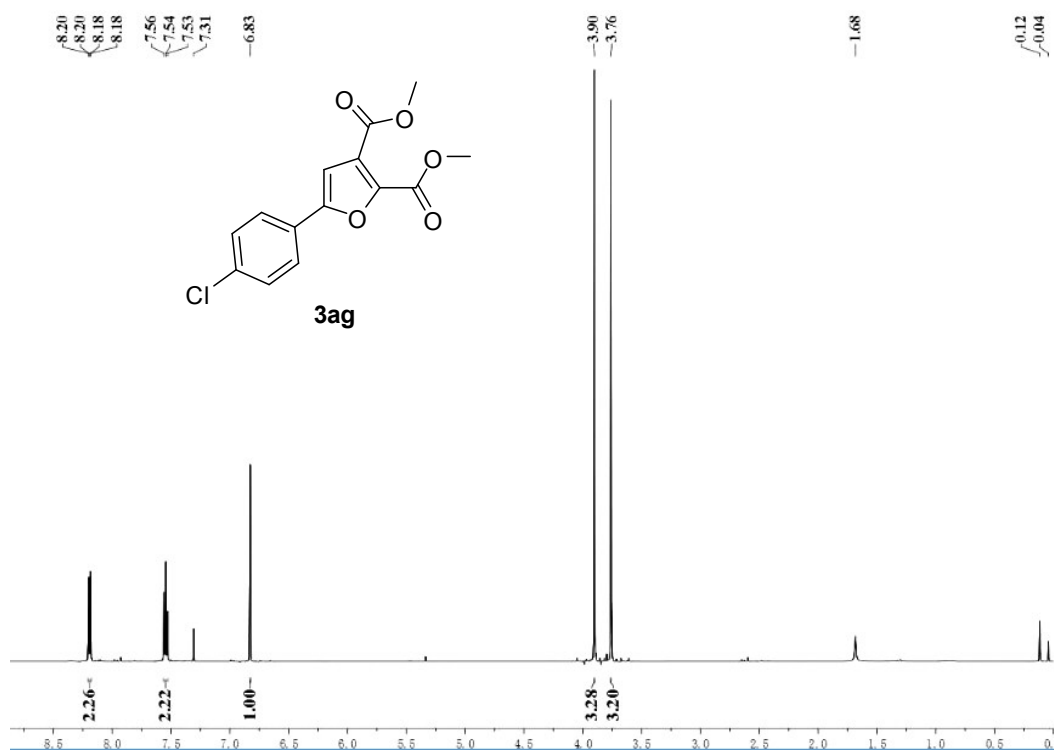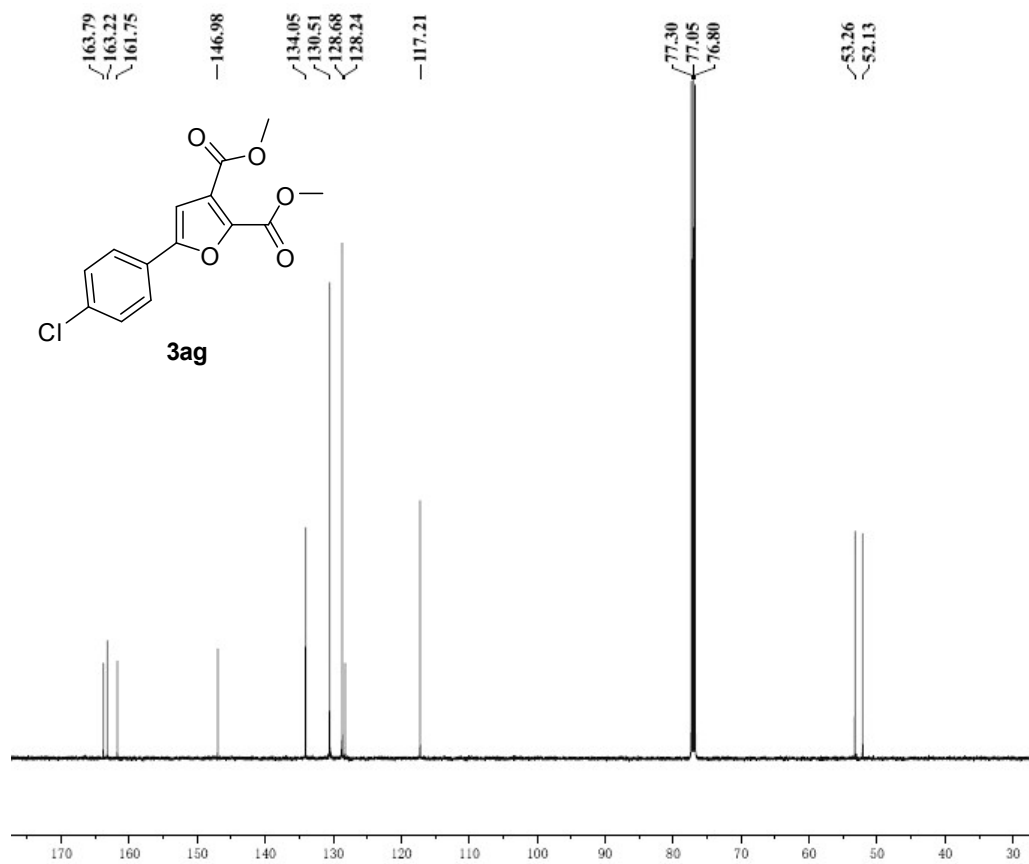



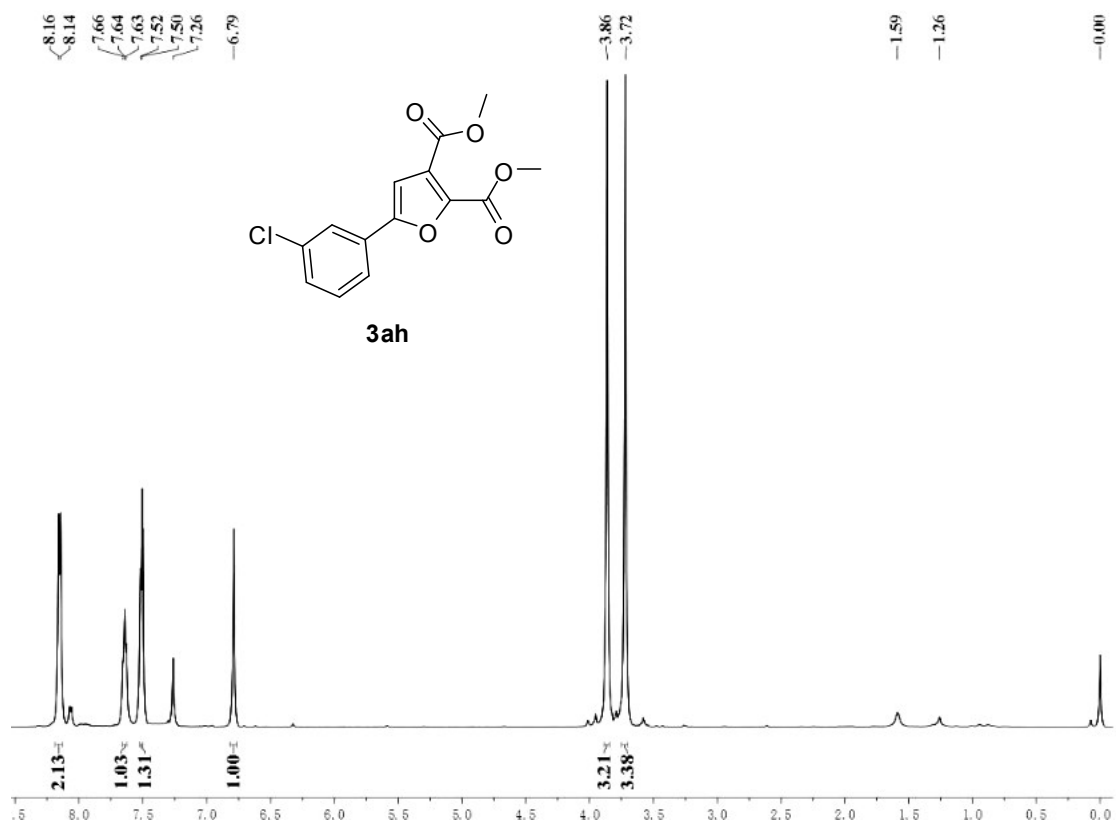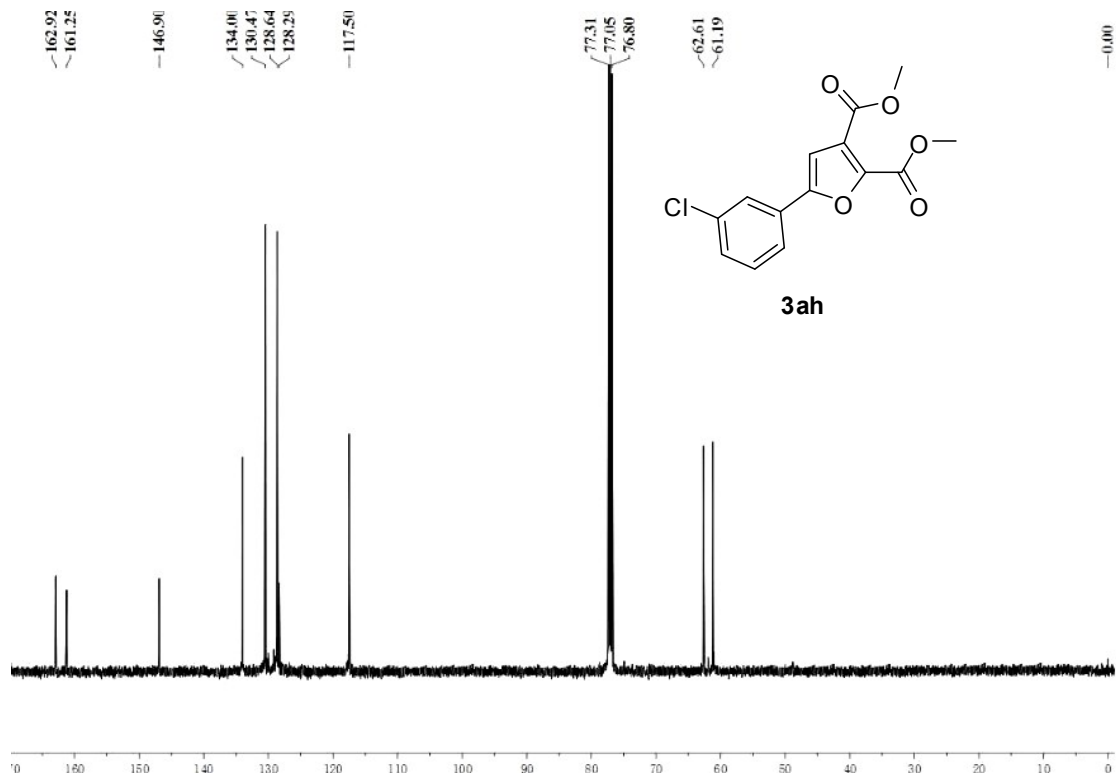

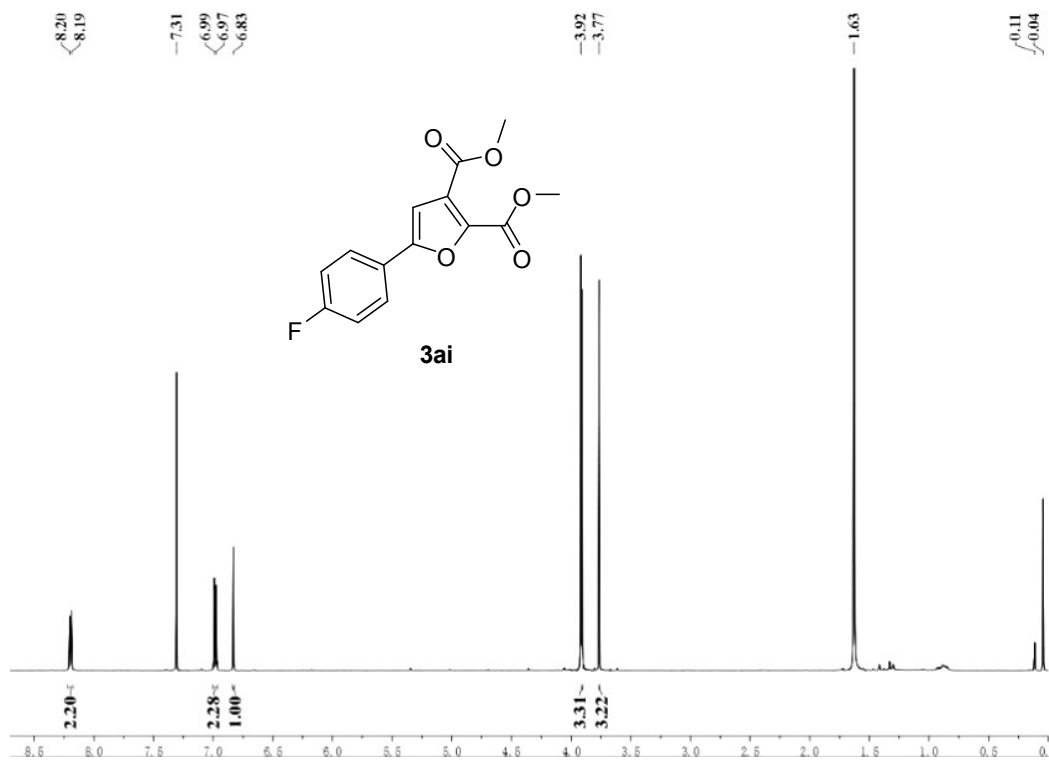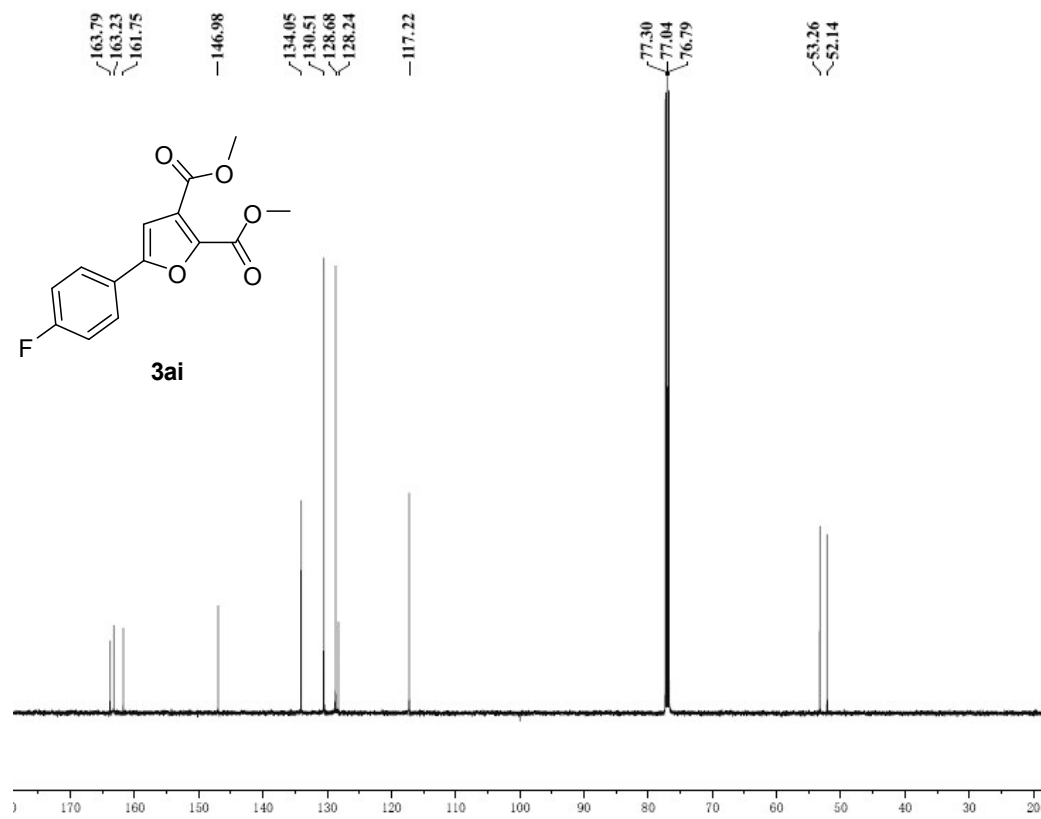

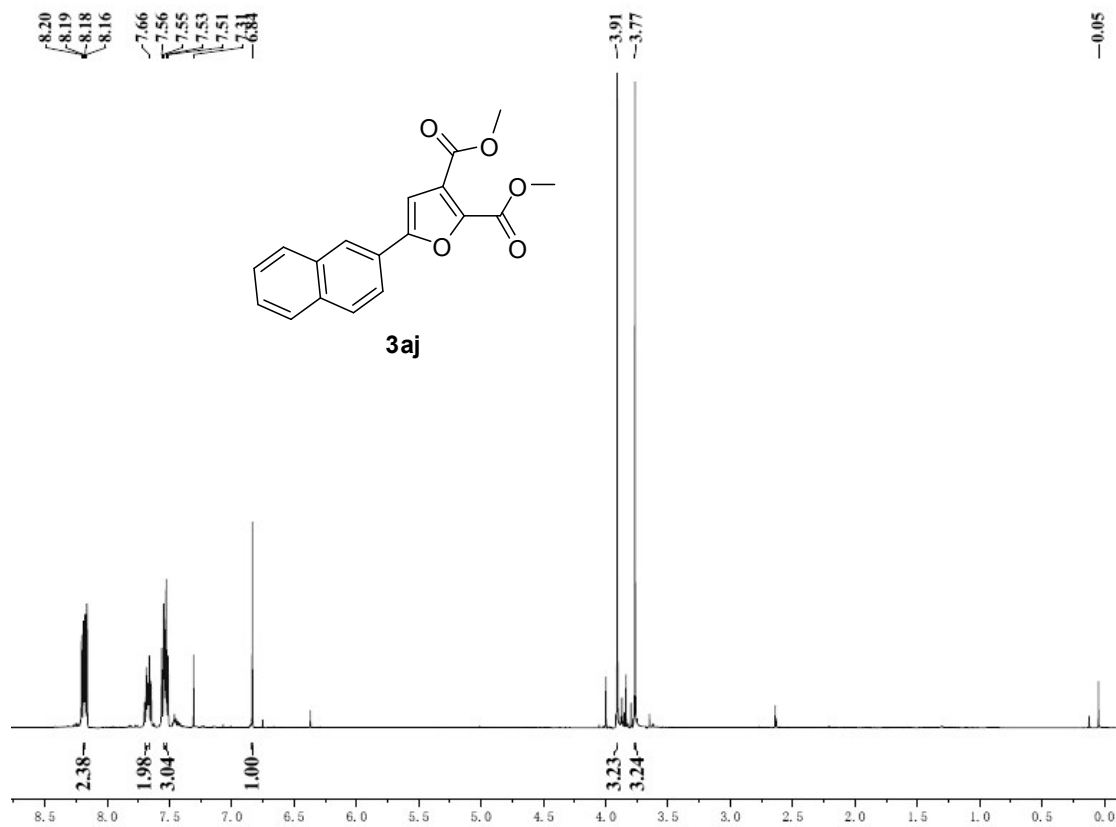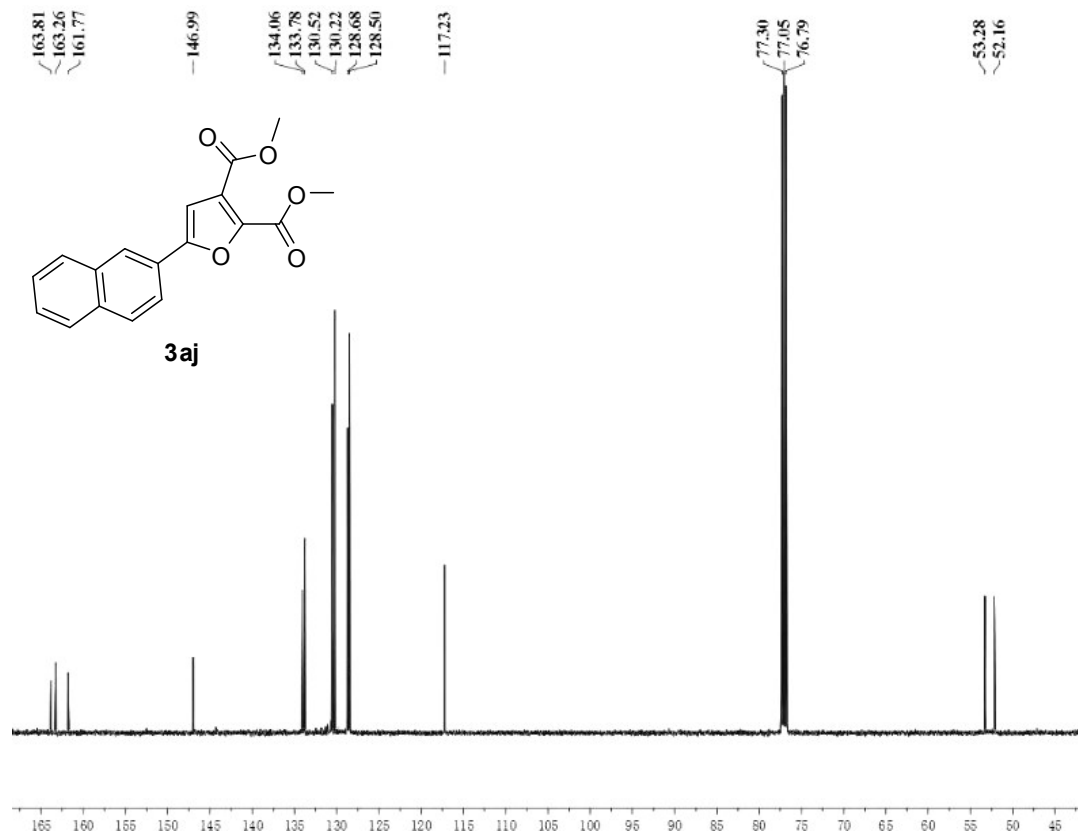

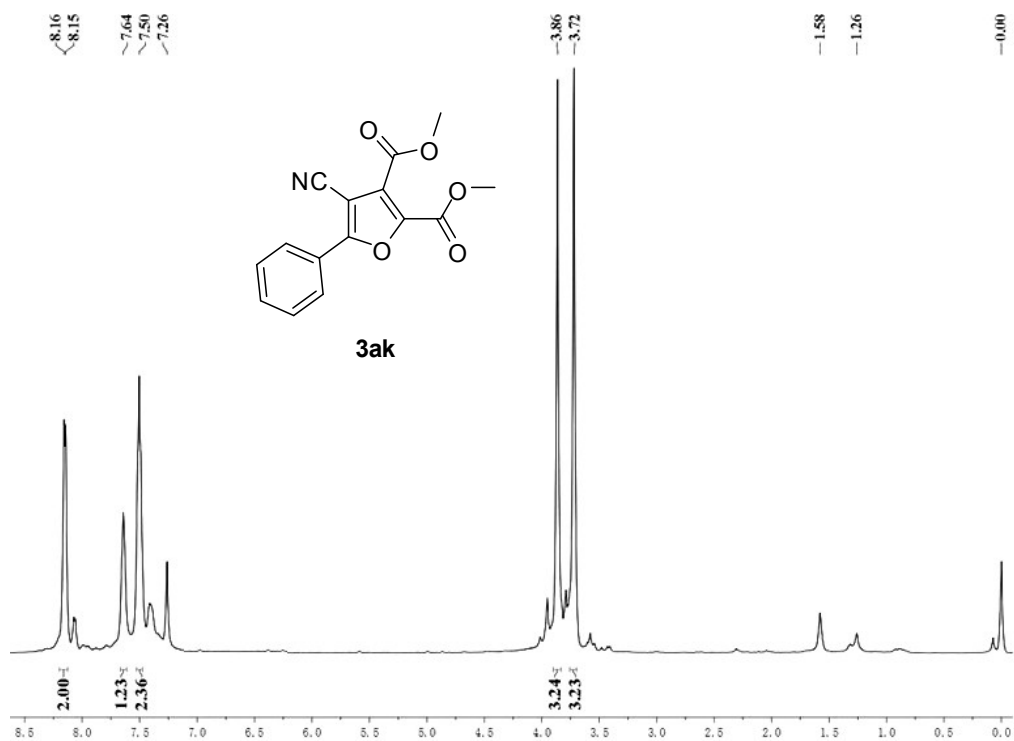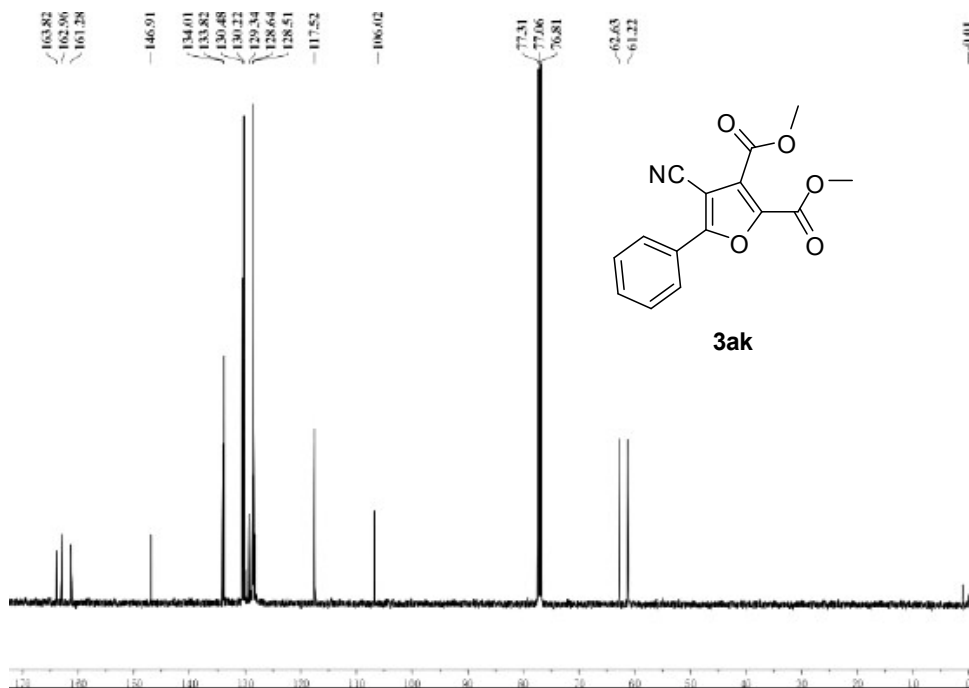

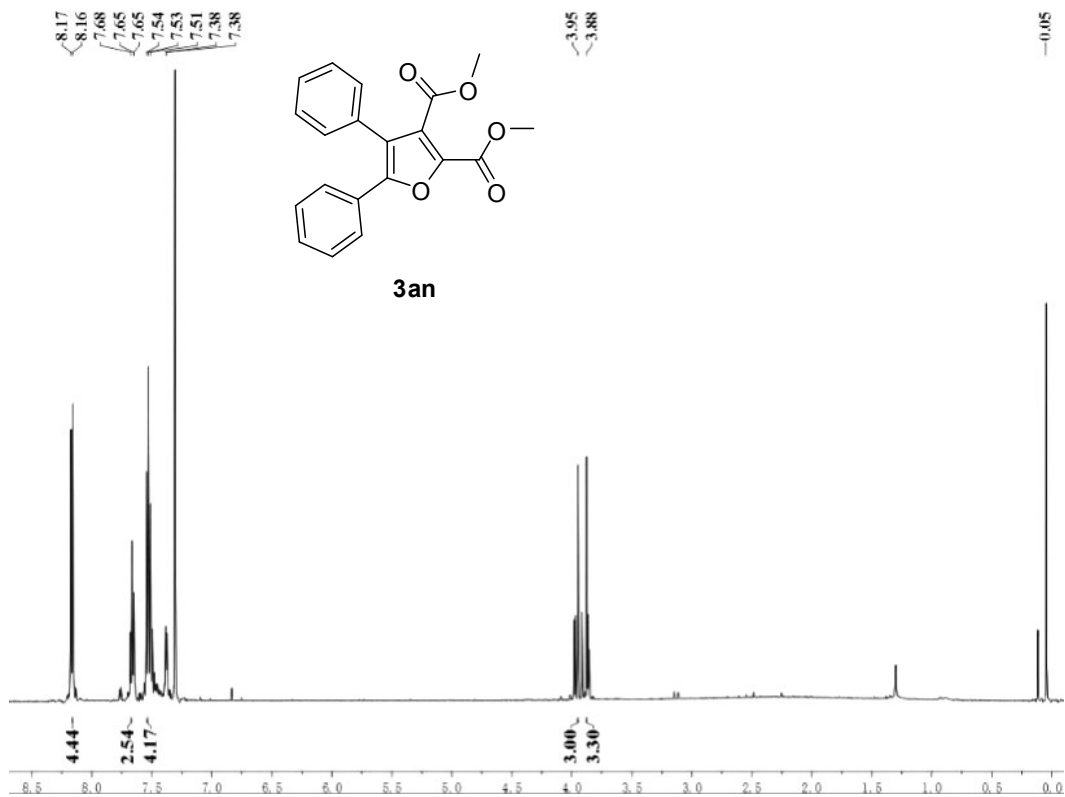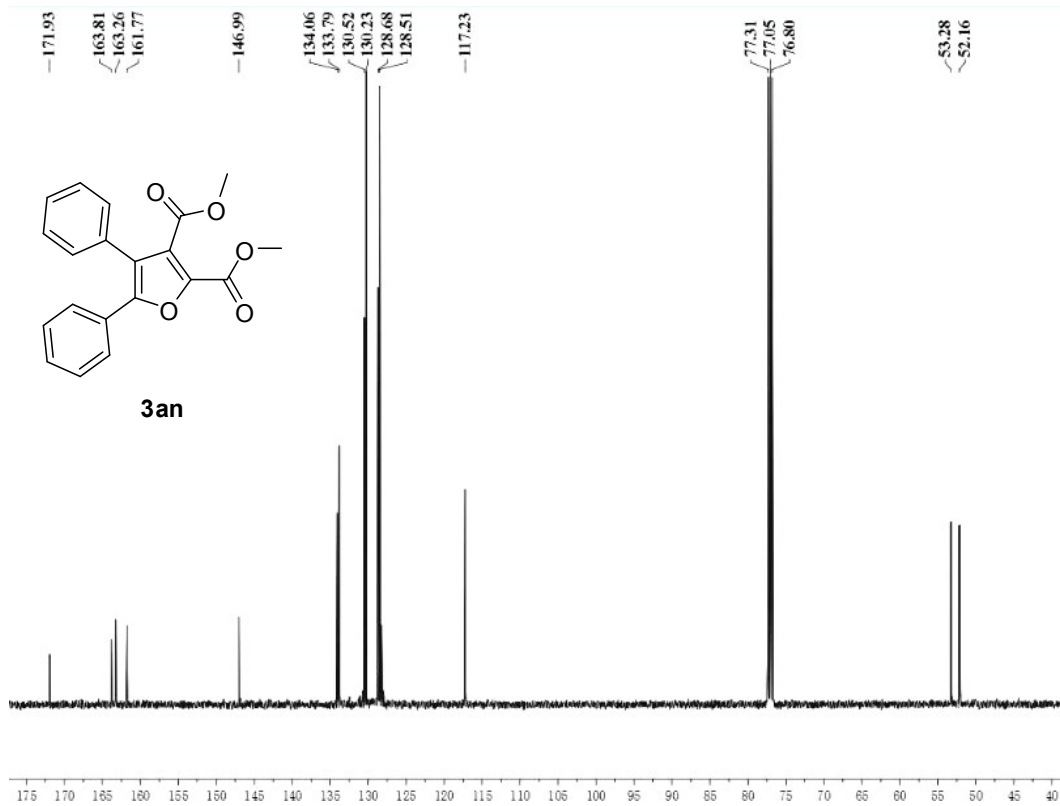

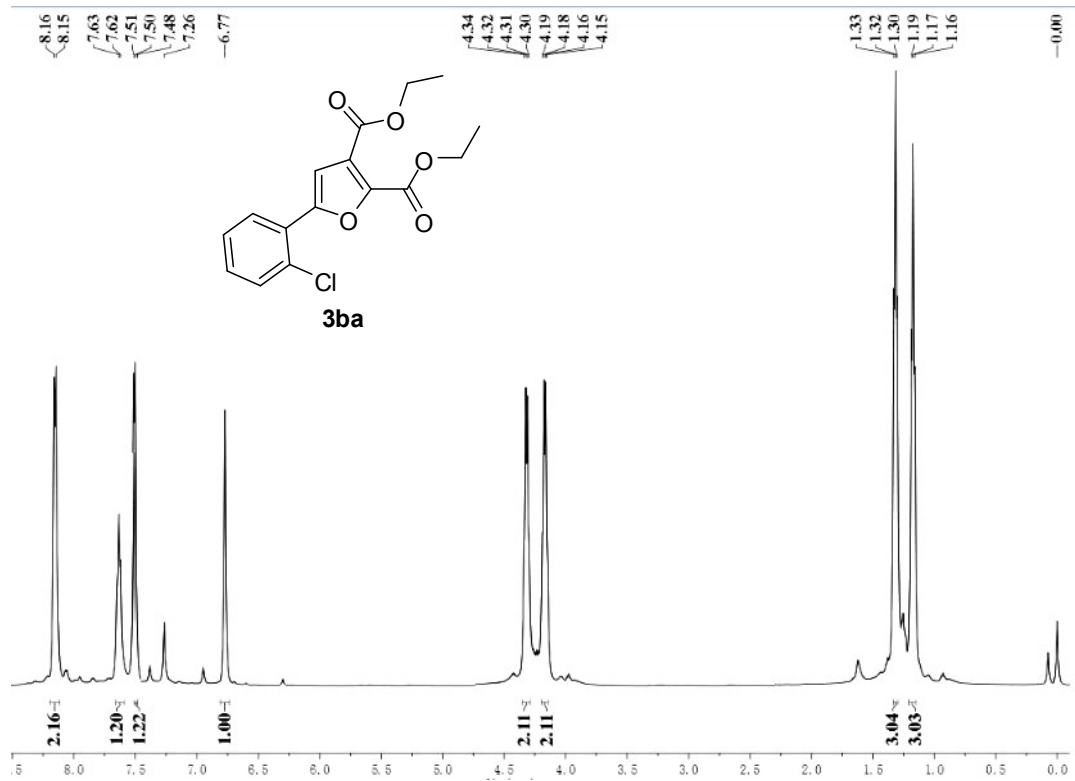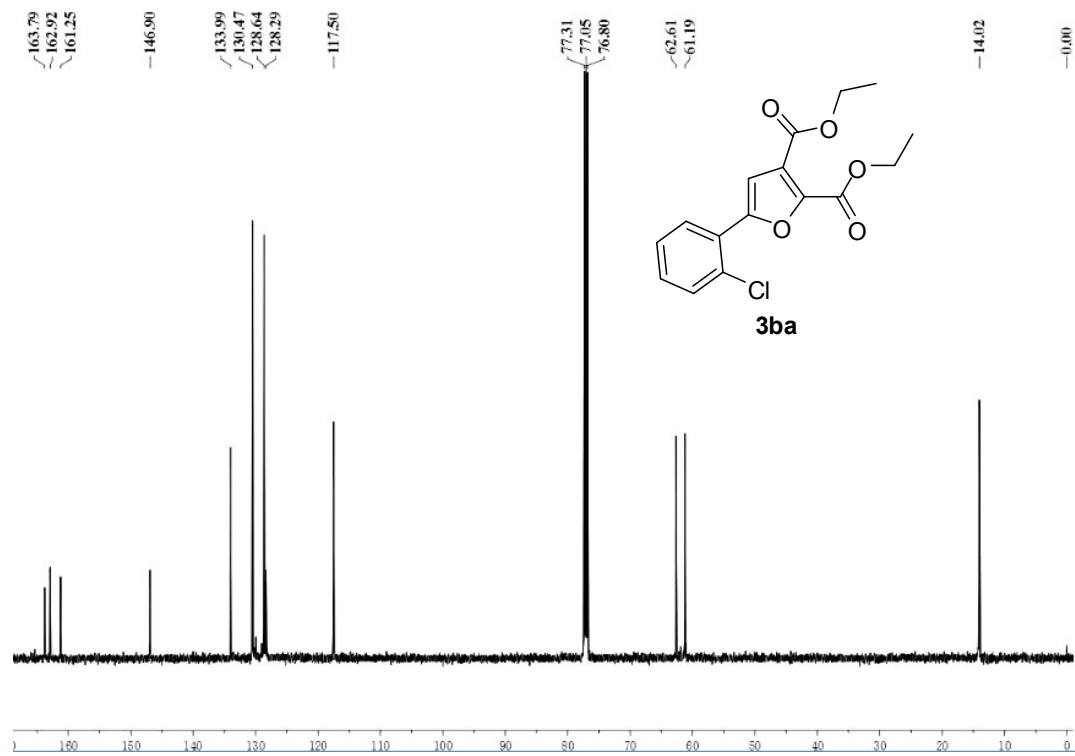

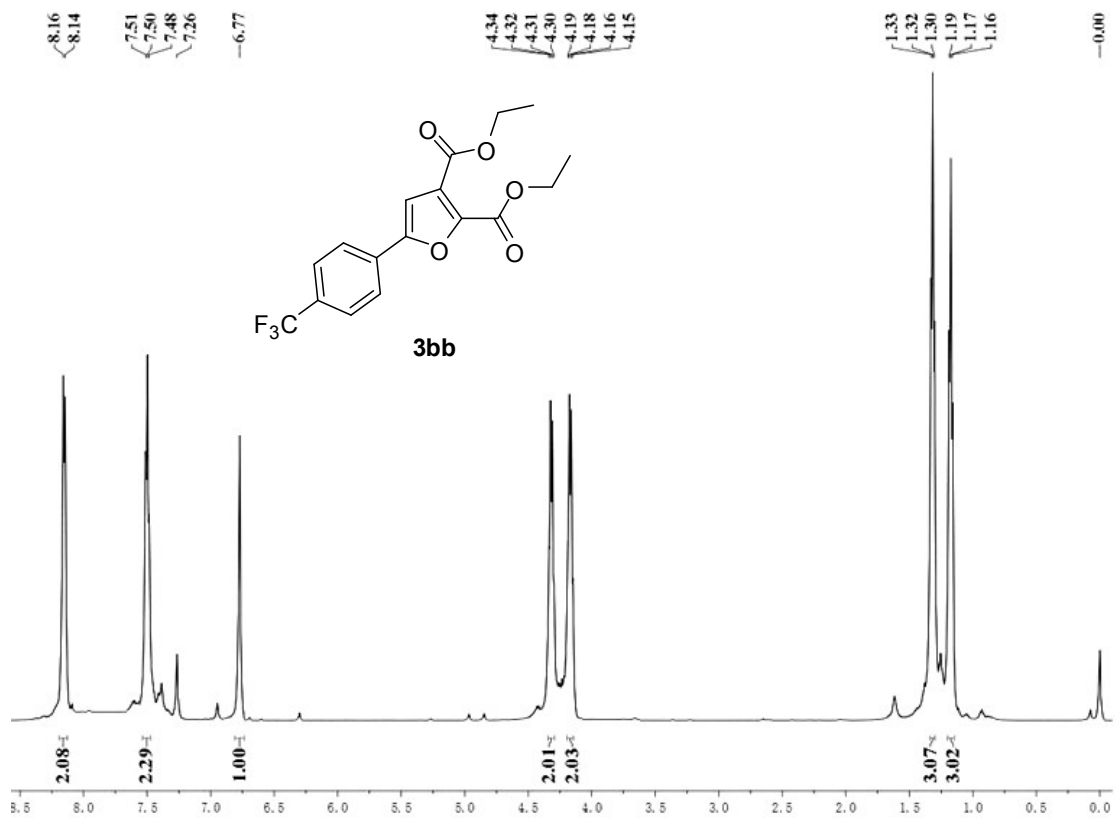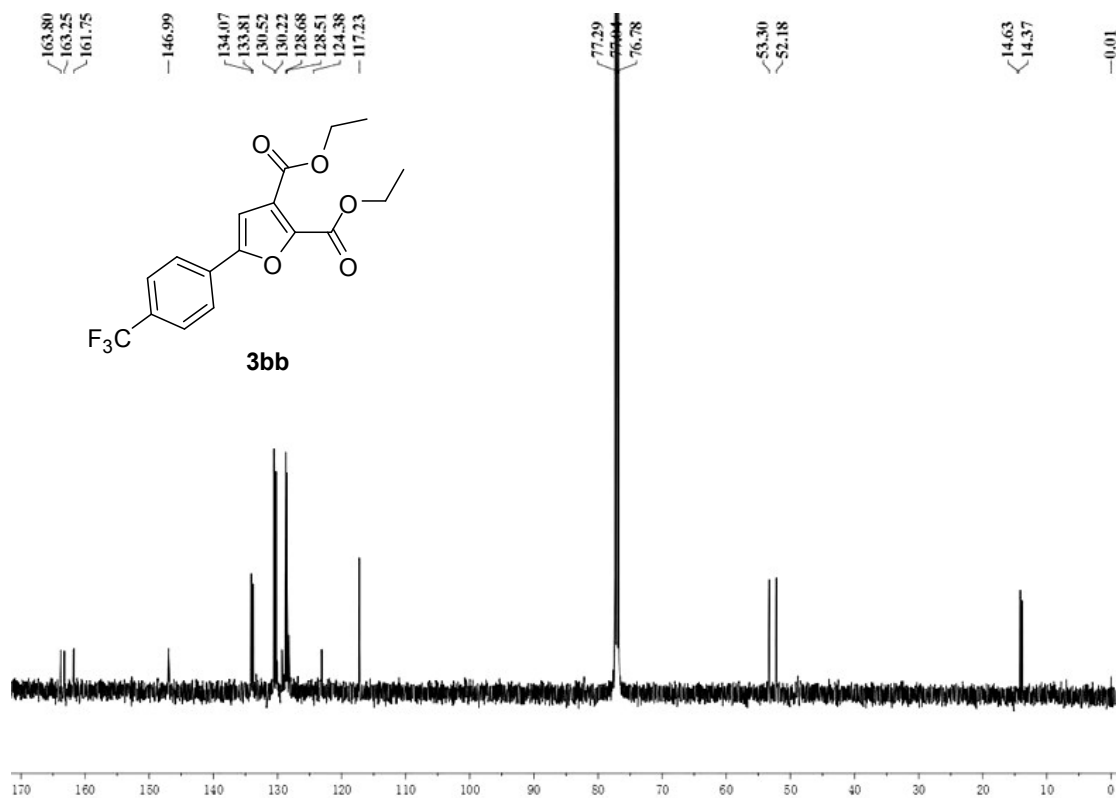

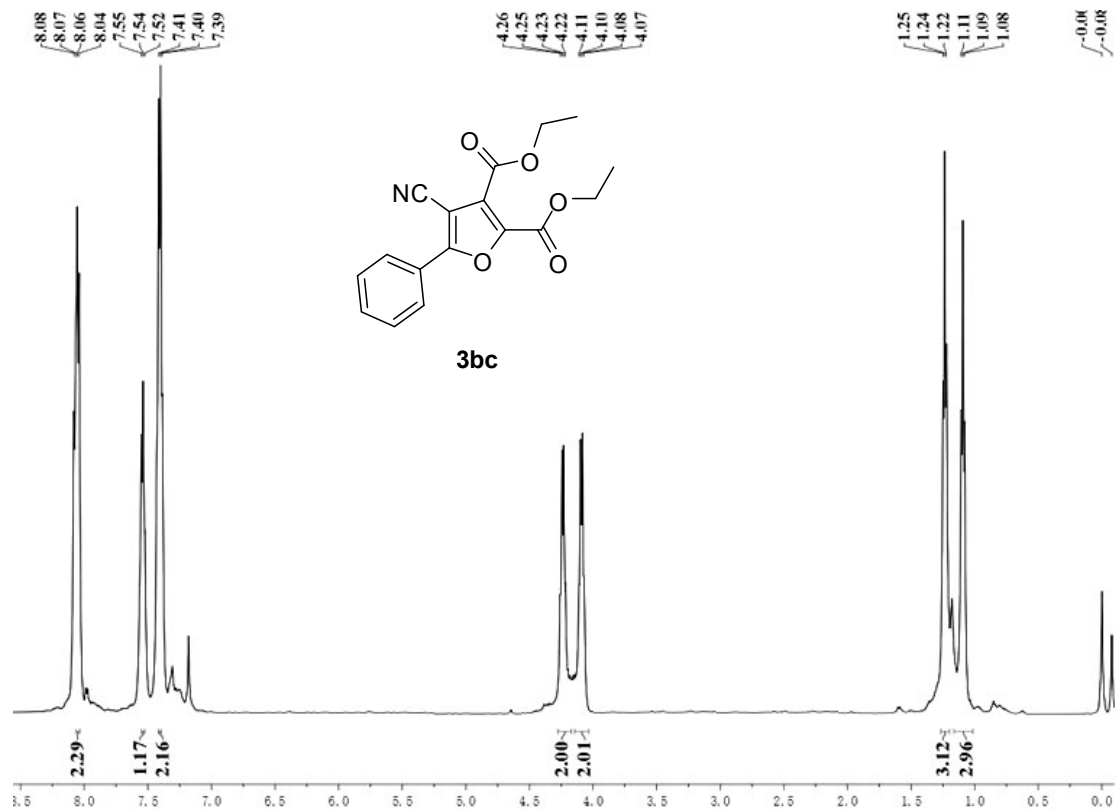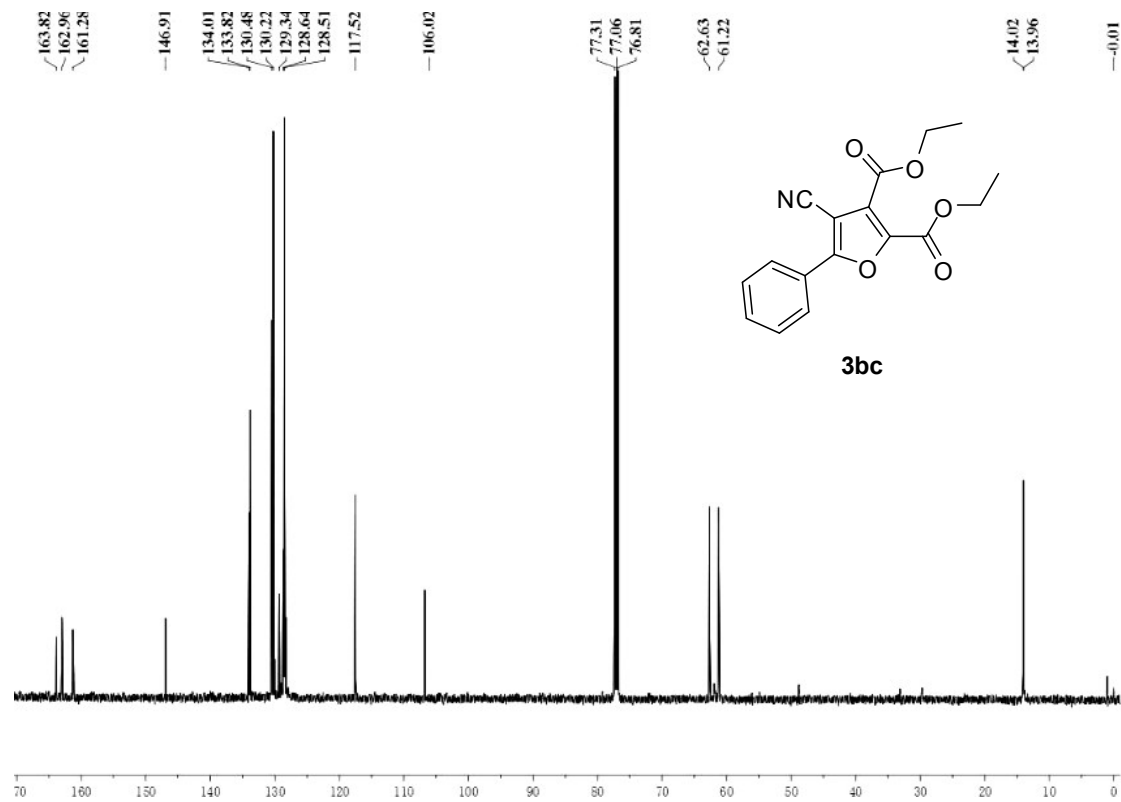



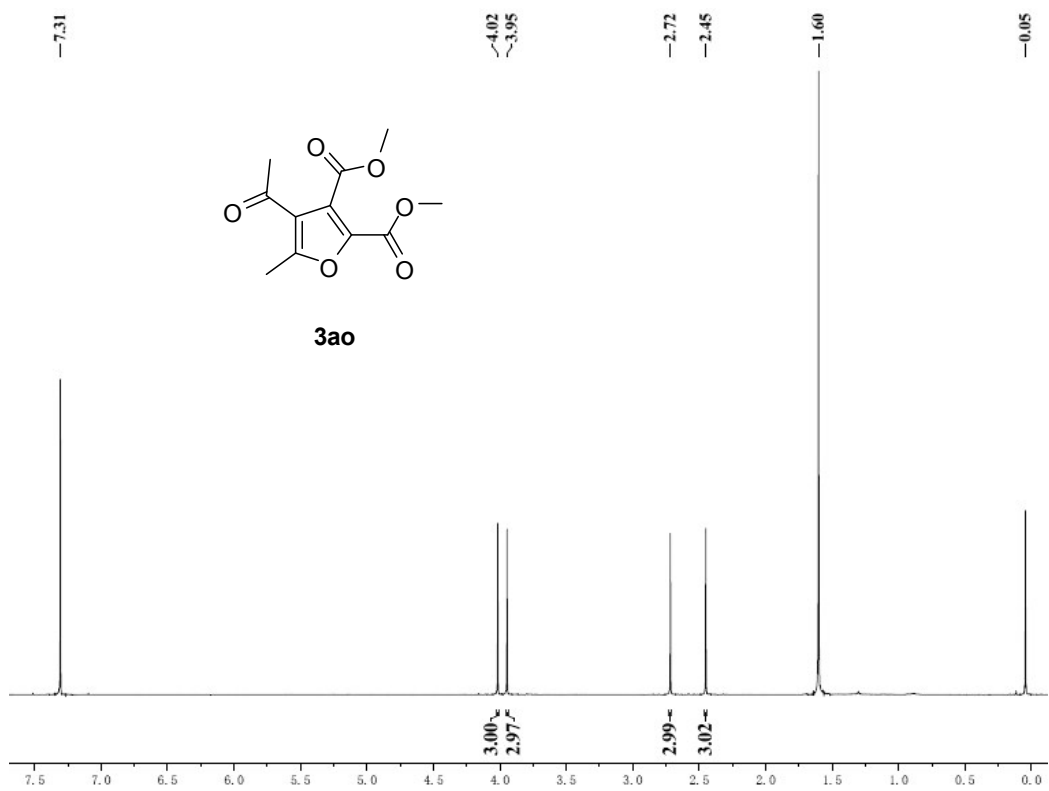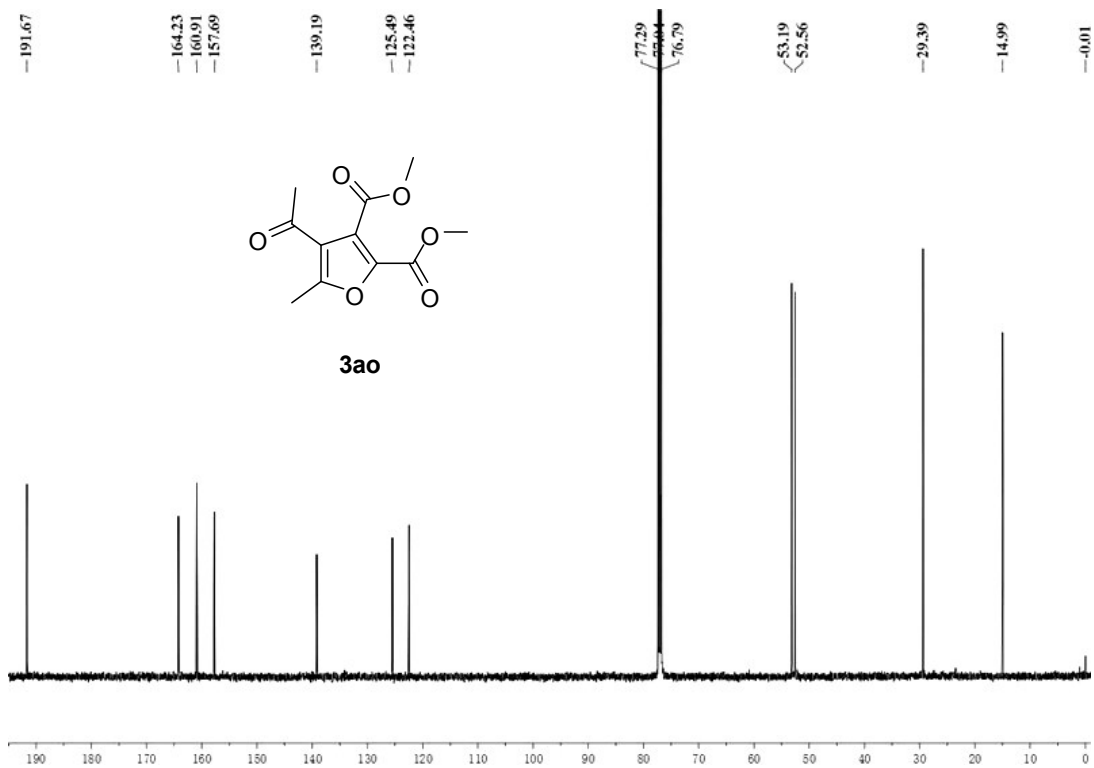

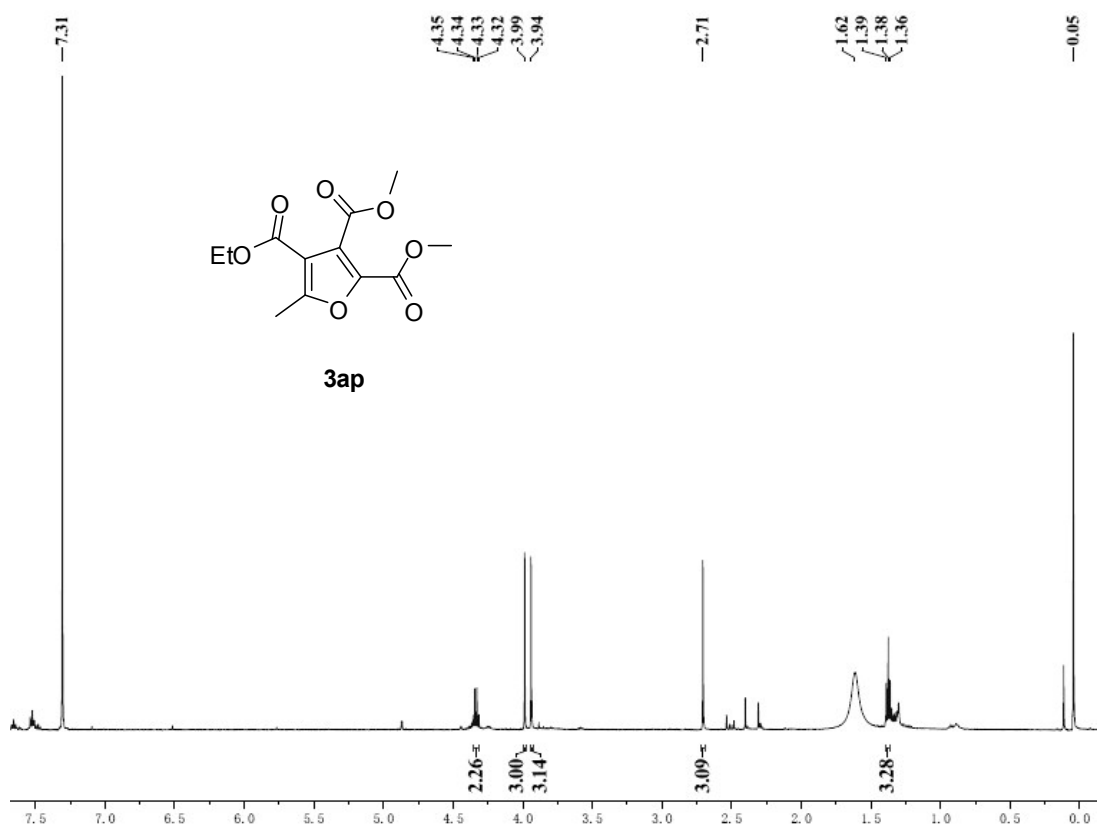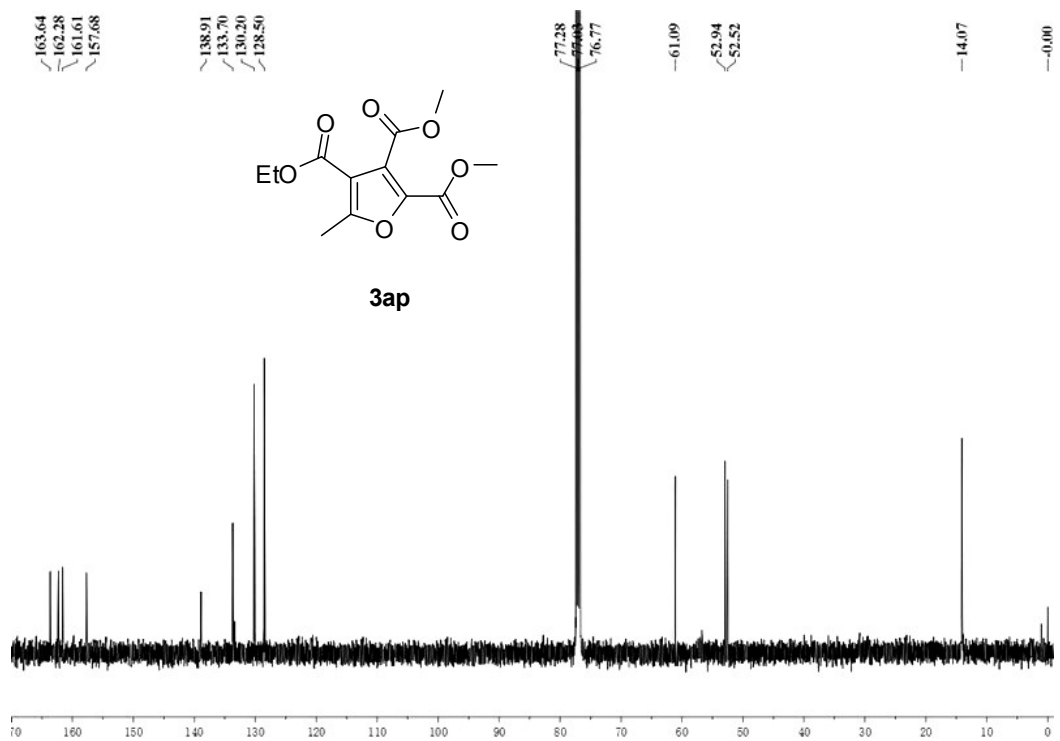

Supplement: c5ra23058f1.pdf [file c5ra23058f1.pdf]
